# Supplementary material
Source: publisher figshare collection journal article supplement (https://tandf.figshare.com/articles/dataset/_/5104846)
Supplement: Supplementary file 2 [file 1]

#### Supplemental material 4

Comparisons of *Tegulariscaptor minor* with *Geotrypus* spp.

The type species *G. acutidentatus* differs from *Tegulariscapheus minor* gen. nov. in:

i) the shortened premolar part of the dentary with the overlapping p2-p4 and the reduced p2; ii) crista obliqua merging the posterior wall of the trigonid at midpoint; iii) the better-developed metaconid of m1; iv) the smaller lingual heel with only a tiny protocone on the P4; v) the more anteriorly shifted lingual heel and the near-absence of a paracingulum and metacingulum in M1; vi) the more robust humerus ; vii) the completely fused bicipital tunnel; viii) the larger and blade-like teres tubercle; ix) reduced width of the minor sulcus.

*Geotrypus antiquus* from the type locality Les Chauffours, France from several localities in the Quercy area, France, from Switzerland and from Enspel, Germany (Crochet 1995; Schwermann & Martin 2012) differs from *Te. minor* gen. nov. in: i) the gapped lower premolars; ii) the slightly divided mesostyle of upper molars; iii) p1 caniniform; iv) reduced protocone of P4; v) the more robust humerus with the pectoral process terminating more laterally; vi) the completely fused bicipital tunnel; vii) larger teres tubercle.

*Geotrypus ehrensteinensis* from the Late Oligocene faunas of Ehrenstein 4 and Eggingen-Mittelhart 1, Germany differs from *Te. minor* gen. nov. in (Ziegler 1990, pl. 7, figs 4-5): i) the loss of one lower incisor; ii) the overlapping p2 and p3, p2 being significantly smaller; iii) the reduced protocone of the P<sup>4</sup>; iv) the divided mesostyle of the upper molars; v) the better-developed metaconid of m1.

*Geotrypus montisasini* from some early Miocene sites in Ulm, Germany and nearby localities differs from *Te. minor* gen. nov. in (Ziegler 1990; pl. 8-9, fig. 1-5): i) the loss of one lower incisor and p2, and the overlapping p3 and p4; ii) the absence of

metacristid and entocristid in the lower molars; iii) the much more robust humerus; iv) the completely fused bicipital tunnel; v) the highly reduced minor sulcus; vi) the larger and blade-like teres tubercle.

*Geotrypus tomerdingensis* from the early Miocene fauna of Tomerdingen near Ulm differ from *Te. minor* gen. nov. (Zielger 1990; pl. 7-8, figs 4-5) in: i) the more robust humerus; ii) the larger and blade-like teres tubercle; iii) the completely fused bicipital tunnel; iv) the enlarged and distally terminating pectoral crest; v) reduced width of the minor sulcus.

Van den Hoek Ostende (2001) described two species from the early Miocene of Turkey. *Geotrypus haramiensis* was recorded from the type locality Harami 3 and from Harami 1 and Kilcak. It differs from *Te. minor* gen. nov. in: i) loss of p2, single-rooted p3 and overlapping lower premolars; ii) the absence of a metacristid in m2; iii) the divided mesostyle of M2 and M3; iv) the more robust humerus; v) larger teres tubercle.

*Geotrypus kesekoeyensis* is only known from some isolated teeth from the type locality Kesekoy, it differs from *Te. minor* gen. nov. in: i) the absence of a metacristid in m1; ii) the projecting precingulid in m2; iii) the crista obliqua does not reach the posterior wall of the trigonid in the m2.; iv) the elongated P4 with a small lingual heel and reduced protocone.
