# Supplementary material
Source: publisher figshare collection journal article supplement (https://tandf.figshare.com/articles/dataset/_/5104846)
Supplement: Supplementary file 3 [file 1]

### Supplemental material 3

Table reporting the humeral average values for DS (smallest diameter of the shaft) and GL (greater length) ratio. Values have been recorded from Ziegler (2012) and measured according to Hutchison (1974). We performed an ANOVA in order to test for difference between species ( $p$ -value = 0.001;  $R^2 = 0.83$ ).

| Species                   | DS*100/GL |
|---------------------------|-----------|
| <i>Ge. Montisasini</i>    | 34.86     |
| <i>Ge. Antiquus</i>       | 30.13     |
| <i>Ge. Tomerdingensis</i> | 29.5      |
| <i>Te. minor</i>          | 26.28     |
