# Supplementary material
Source: publisher figshare collection journal article supplement (https://tandf.figshare.com/articles/dataset/_/5104846)
Supplement: Supplementary file 4 [file 1]

## Supplemental material 2

*Tegulariscaptor minor* gen. nov. material used in this study.

| Locality      | Museum code                 | Material                                                                                                          |
|---------------|-----------------------------|-------------------------------------------------------------------------------------------------------------------|
| Herrlingen 7  | SMNS 43253, 43255A3-5, B3-5 | Right P4, left M1-fragment, right M2-fragment, 3 M3, left and right humerus                                       |
| Ehrenstein 8  | SMNS 45220, SMNS 47460      | Right m1, 3 humeral fragments                                                                                     |
| Ehrenstein 10 | SMNS 45216 A, B; SMNS 47461 | Right M1, left M2; 2 humerus fragments                                                                            |
| Ehrenstein 11 | SMNS 45194 C1               | Left m3                                                                                                           |
| Liptingen 1A  | SMNS 47463                  | Left m1, right m2-fragment, left maxillary fragment with P4-M1                                                    |
| Liptingen 1C  | SMNS 47720                  | Left P4, right M2                                                                                                 |
| Möhren 13     | BSPG 1972 XI 6142-6377      | 10 dentary fragments with teeth, left maxillary fragment with P4, 84 isolated teeth, 66 humeri (mostly fragments) |
